# Supplementary material for: The Autonomic Craving Signature: physiological signals as a daily-life biomarker of craving
Source: Research Square preprint supplement (doi:10.21203/rs.3.rs-4432651/v1), 2024-12-17
Supplement: Supplementary file 2 [file a8be643b5aafc575bd84505d.docx]

**SUPPLEMENTARY**

**The Autonomic Craving Signature: physiological signals as a daily-life biomarker of craving**

**Authors :**

Emmanuelle Baillet, PhD.1,2,3

Fuschia Serre, PhD.1,2,3

Hakim Si-Mohammed, PhD.4

Cassandre Romao, MSc.1,2,3

Arthur Bruneau, MSc.1,2,3

Chloé Vacher, MSc.1,2,3

Thibaut Monseigne, MSc.1,2,3

Camille Jeunet-Kelway, PhD.5

Marc Auriacombe, MD.*1,2,3

**Affiliations:**

1 Univ. Bordeaux, SANPSY, UMR 6033, F-33000 Bordeaux, France

2 CNRS, SANPSY, UMR 6033, F-33000 Bordeaux, France

3 Pôle Interétablissement d’Addictologie, CH Ch. Perrens and CHU de Bordeaux, F-33076 Bordeaux, France

4 Univ. Lille, CNRS, Centrale Lille, UMR 9189 CRIStAL, F-59000 Lille, France

5 Univ. Bordeaux, CNRS, EPHE, INCIA, UMR5287 F-33000 Bordeaux

Keywords: Craving, Substance Use Disorder, Biomarker, Ecological Momentary Assessment, Wearable Sensor, Machine Learning, Classification, Heart Rate, Electrodermal Activity, Accelerometer, Skin Temperature

***Corresponding author**

**Marc Auriacombe**

**+336 077 643 71**

[**marc.auriacombe@u-bordeaux.fr**](mailto:marc.auriacombe@u-bordeaux.fr)

**Analysis strategy step by step**

1. **Sample labeling:** epochs of 20 minutes randomly selected in the EMA periods corresponding to “no-craving” class, and epochs of 20 minutes centered on a TAG (10 minutes before and after) in the EMA period corresponding to “craving” class. This time window was based on the literature exploring craving duration 1-6 . Several samples of no-craving were to build from period corresponding to “no-craving” class to maximize their number. When several TAG were reported in the same period of EMA corresponding to craving class, several 20-minutes samples were built during this EMA period, with no overlap in time between the constructed samples.
2. **Feature extraction:** From sample of 20-minutes, several features were extracted for each physiological signal by domain types: time-, frequency- or non-linear-domains 7,8 (Supplementary Table 1). Based on the literature, we chose to be comprehensive to ensure a completeness of features 9-16.
3. **Feature filtering:** All features were standardized on the same scale to eliminate bias due to scale deviations during classification process. Then, we proceeded to feature transformations by testing different possibilities using data from subjects with the largest total number of features (all classes combined) available. The different possibilities tested were: distribution changes by transformation (6 possibilities: logarithm transformation, exponential transformation, square power transformation, cubic power transformation, root power transformation, quadratic power transformation) and robust standardization (2 possibilities). In all, 12 possibilities (6*2) were performed to improve and normalize features, i.e., for each feature, there was 12 transformed features. In order to obtain the most standardized features possible for further analysis, we calculated different metrics for each transformed feature: mean, standard deviation, quantile range (amplitude between percentiles 99% and 1%), kurtosis and skewness. For each feature, the transformed feature the closest to 1 of SD, closest to 0 of kurtosis and skewness and closest to 0 of mean was retained. Then, to identify and eliminate features that may be less informative and do not contribute to performance, we rejected some features in case of the following criteria: (1) low standard deviation (SD) (Min-max normalization): features with low SD ≤5%, i.e., those with little variation across dataset were filtered. To determine SD, each feature value was normalized based on the Min-Max Normalization 17 which allows value of features to be scaled within a specific range [0-1] or (2) high correlation: features highly correlated with threshold of ≥0.98. The feature kept was the one with the best distribution and the closest scale to the other features.
4. **Dimension reduction:** PCA works by identifying the principal directions that capture the maximum variance in the data, regardless of class (*step 4: dimension reduction*). Principal components (PCs) are ordered according to their ability to explain the total variance in the data 18. Variance into data was examined regardless of class because PCA is a non-supervised algorithm, i.e., only variance into features data was analyzed, without Class labels. For a participant to be included in these between-individual analysis, the threshold was set at 20 samples/classes per participant, to overcome the over-fitting problems. The number of “craving” and “no-craving” samples had to be equal to maintain a balance. The samples retained were selected as close as possible in time (for example, for a sample from the "Craving" class around midday, a sample from the "non-Craving" class was selected closest to midday). The number of PCs retained 19-21 should contribute to the increase in the ratio of variance explained at the ≥0.001% threshold.
5. **Classification:** To prevent overfitting and having a great reliability of our classifier, k-fold cross-validation was applied (k=10) 22. In our dataset, 80% were used for training and 20% as a test set. This process was repeated 10 times, each time using a different subset as the test set ensuring that the results were not influenced by a good/bad random subset. Then, the performance of model of test datasets were averaged and the results were obtained on a test set.
6. **Permutation test:** Permutation tests were employed to evaluate the statistical significance of classifier performance. These tests gauge the probability of achieving the observed classifier performance purely by random chance, stemming from patterns in the multi-dimensional data that coincidentally align with the membership labels due to the limitations of a small dataset size 23. Consequently, permutation tests provide precise regulation of error rates. To estimate statistical significance of the cross-validation classifier accuracy for a *α* risk of 5%, we performed 100 randomized cross-validation iterations.

**Supplementary Table 1. Features extracted from all physiologic signals.**

A total of 190 features from all the different signals were extracted: 109 features extracted from EDA raw data, 65 features from BVP raw data, 2 features from TEMP raw data, 12 features from ACC raw data and 2 from daily-life signal.

| **Feature name** | **Definition and formula if applicable** | **Unit** | **References** |
| --- | --- | --- | --- |
| **EDA signal** | | |  |
| ***Time-domain features*** | | |  |
| **Mean** | Mean of signal: | MicroSiemens (μS) | 12,15,24 |
| **Std** | Standard deviation of signal: | μS |
| **Kurtosis** | Shape of the curve relative to a normal distribution. A positive kurtosis indicates a sharper distribution (more concentrated around the mean) than a normal distribution, while a negative kurtosis indicates a flatter distribution (more spread out) than a normal distribution. | μS |
| **Skewness** | Measure of the asymmetry of the distribution. Positive skewness indicates rightward asymmetry, which is indicative of peak activity. | μS |
| **Power** | Power of signal. Mean of square values: | MicroSiemens square (μS2) |
| **SCR peak count** | Skin Conductance Responses (SCR) peak counts | No unit | 12,24-26 |
| **SCR Mean amplitude** | Summed magnitude of the SCRs | μS |
| **SCR rise time** | Summed of rise time SCR divided by peak counts | s |
| **SRC AUC** | Summed area under the SCRs | MicroSiemens-seconds (μS.s) |
| **Tonic component (not feature)** | **The tonic change, which is also known as SCL, refers to the smooth and gradual changes in the EDA response signal, which occur in the absence of stressing stimuli.** | |
| **Tonic min** | Minimum of tonic component | μS |
| **Tonic Max** | Maximum of tonic component | μS |
| **Tonic Mean** | Mean of tonic component | μS |
| **Tonic Std** | Standard deviation of tonic component | μS |
| **Phasic component (not feature)** | **The phasic change, which known as SCR, refers to the rapid/sudden changes in the EDA response.** | |
| **Phasic Min** | Minimum of phasic component | μS |
| **Phasic Max** | Maximum of phasic component | μS |
| **Phasic Mean** | Mean of phasic component | μS |
| **Phasic Std** | Standard deviation of phasic component | μS |
| **Hjorth Activity** | measures the overall level of signal activity. It is calculated by evaluating the average signal energy. | No unit |
| **Hjorth Mobility** | measure of the signal’s average frequency, indicating the amount of rapid variation. It is calculated by evaluating the variation in the signal’s rate of change. | No unit |
| **Hjorth Complexity** | measures the signal’s level of complexity or diversity. It is calculated by evaluating the variation in the signal’s rate of change. | No unit |
| ***Frequency-domain features*** | | |  |
| **PSD Min** | Minimum of spectral band powers in the [0.05-0.5] Hz bands | μS | 12,16,27 |
| **PSD Max** | Maximum of spectral band powers in the [0.05-0.5] Hz bands | μS |
| **PSD Std** | Std of spectral band powers in the [0.05-0.5] Hz bands | μS |
| **PSD Mean** | Sum of PSD in the [0.05-0.5] Hz bands |  |
| **Energy Wavelet** | Energy for wavelet levels [Absolute] [1-4] | μS |
| **Energy distribution** | Energy percentage for wavelet levels [1-4] | μS |
| **Entropy Wavelet** | Entropy for wavelet levels [1-4] | μS |
| **RMS Wavelet** | Root mean square for wavelet coefficients [1-4] | μS |
| **Mean MFCC** | Mean of MFCC coefficients [0-12] | μS |
| **Std MFCC** | Standard deviation of MFCC coefficients [0-12] | μS |
| **Median MFCC** | MFCC coefficients for all frames [0-12] | μS |
| **Kurt MFCC** | Kurtosis of MFCC coefficients [0-12] | μS |
| **Skew MFCC** | Skewness of MFCC coefficients [0-12] | μS |
| **BVP signal** | | |  |
| ***Time-domain features*** | | |  |
| **Mean HR** | Mean of heart rate (HR) | Beats/min (bpm) | 10,28,29 |
| **Std HR** | Standard deviation of HR | bpm |
| **NN (not feature)** | Time interval between two consecutive QRS complex (including R peaks, S peaks and P peaks) | Seconds (s) |
| **MeanNN** | Mean of NN interval: | s |
| **SDNN** | Standard deviation of NNi: | s |
| **MedianNN** | Median of NN intervals: | s |
| **MadNN** | Standard deviation from median: | s |
| **MCVNN** | Median absolute deviation of NN intervals divided by median of NN intervals: | No unit |
| **MinNN** | Minimal of NN intervals: | s |
| **MaxNN** | Maximal of NN Intervals: | s |
| **rMSSD** | root mean square of successive RR intervals differences: | s |
| **SDSD** | the standard deviation of successive differences between NN intervals: | s |
| **CVNN** | Standard deviation of NN intervals divided by mean of NN intervals: | No unit |
| **CVSD** | Mean square root of successive differences divided by the mean of the NN intervals: | No unit |
| **IQRNN** | Interquartile range of RR intervals | s |
| **Prc20NN** | The 20th percentile of RR intervals | s |
| **Prc80NN** | The 80th percentile of RR intervals | s |
| **pNN50** | Percentage of successive RR intervals that differ by more than 50ms | No unit |
| **pNN20** | Percentage of successive RR intervals that differ by more than 20ms | No unit |
| **HTI** | HRV triangular index, measuring the total number of RR intervals divided by the maximum height of the RR interval histogram | No unit |
| **TINN** | Geometric HRV parameter, or more precisely, the base width of the RR interval distribution obtained by triangular interpolation, where the least-squares error determines the triangle. It is an approximation of the RR interval distribution | s |
| **SDANN1** | Standard deviation of the mean RR Intervals over the period divided into 1-minute segments | s |
| **SDNNI1** | Mean Standard Deviation of RR Intervals over the period, divided into 1-minute segments | s |
| **SDANN2** | Standard deviation of the mean RR Intervals over the period divided into 2-minute segments | s |
| **SDNNI2** | Mean standard deviation of RR intervals over the period, divided into 2-minute segments | s |
| **SDANN5** | Standard deviation of the mean RR Intervals over the period divided into 5-minute segments | s |
| **SDNNI5** | Mean Standard Deviation of RR Intervals over the period, divided into 5-minute segments | s |
| ***Frequency-domain features*** | | |  |
| **HRV power ULF** | Absolute Spectral Power of Ultra Low Frequencies ([0, 0.0033]): | s2 | 10,28,29 |
| **HRV power VLF** | Absolute Spectral Power of Very Low Frequencies ([0.0033, 0.04]): | s2 |
| **HRV power LF** | Absolute Spectral Power of Low Frequencies ([0.04, 0.15]): | s2 |
| **HRV power HF** | Absolute Spectral Power of High Frequencies ([0.15, 0.4]): | s2 |
| **HRV power VHF** | Absolute Spectral Power of Very High Frequencies ([0.4, 0.5]): | s2 |
| **HRV LF/HF** | Low / High frequency ratio: | No unit |
| **HRV Power LFn** | Normalized Absolute Spectral Power of Low Frequencies ([0.04, 0.15]): | s2 |
| **HRV Power HFn** | Normalized Absolute Spectral Power of High Frequencies ([0.15, 0.4]): | s2 |
| **HRV Power log LF** | Logarithmic Absolute Spectral Power of Normalized High Frequencies: | s2 |
| ***Non-linear-domain features*** | | |  |
| **SD1** | Standard deviation perpendicular to the identity line. | s | 28 |
| **SD2** | Standard deviation along the identity line. | s |
| **SD1/SD2** | Ratio SD1/SD2: | No unit |
| **S** | Elipse zone described by SD1/SD2: | Second square (s2) |
| **CSI** | Cardiac Sympathetic Index is a measure of cardiac sympathetic function independent of vagal activity, calculated by dividing the longitudinal variability of the Poincaré diagram by its transverse variability: | Not unit |
| **CVI** | Cardiac Vagal Index is equal to the logarithm of the product of longitudinal and transverse variability: | Not unit |
| **CSI modified** | division of the square of the longitudinal variability by its transverse variability: | Not unit |
| **PIP** | Percentage of inflection points in the RR interval series | Not unit |
| **IALS** | Inverse of the average length of acceleration/deceleration segments |  |
| **PSS** | Percentage of short segments | Not unit |
| **PAS** | Percentage of NN intervals in alternating segments | Not unit |
| **ApEn** | Approximate entropy | Not unit |
| **SampEn** | Sampling entropy | Not unit |
| **ShanEn** | Shannon Entropy | Not unit |
| **FuzzyEn** | Fuzzy entropy | Not unit |
| **MSEn** | MSE entropy | Not unit |
| **CMSEn** | CMS Entropy | Not unit |
| **RCMSEn** | RCMSE Entropy | Not unit |
| **CD** | Fractal correlation | Not unit |
| **HFD** | Fractal Higuchi | Not unit |
| **KFD** | Fractal Katz | Not unit |
| **LZC** | Lempelziv Complexity | Not unit |
| **GI** | Guzik index, defined as the distance from points above the line of identity (LI) to LI divided by the distance from all points on the Poincaré line to LI, except those on LI | Not unit |
| **SI** | Slope index, defined as the phase angle of points above LI divided by the phase angle of all points on the Poincaré plot, except those on LI | Not unit |
| **AI** | Area index, defined as the cumulative area of sectors corresponding to points above LI divided by the cumulative area of sectors corresponding to all points on the Poincaré plot except those on LI | Not unit |
| **PI** | Porta index, defined as the number of points below LI divided by the total number of points in the Poincaré diagram, excluding those on LI | Not unit |
| **C1d** | Contribution of heart rate decelerations to short-term HRV. | Not unit |
| **C1a** | Contribution of heart rate accelerations to short-term HRV. | Not unit |
| **DFA alpha1** | Monofractal fluctuation analysis with no HR signal trend, corresponding to short-term correlations. | Not unit |
| **DFA alpha2** | Monofractal fluctuation analysis with no HR signal trend, corresponding to long-term correlations. | Not unit |
| **TEMP signal** | | |  |
| ***Time-domain features*** | | |  |
| **Mean TEMP** | Average temperature | Celsius (°C) | 24,30 |
| **Std TEMP** | Standard deviation of temperature | °C |
| **ACC signal** | | |  |
| ***Time-domain features*** | | |  |
| **Magnitude (not feature)** |  | *Gravity (g)* | *13,31* |
| **RMS** | root mean square of the average of the acceleration data on the three axes (X, Y, Z). This is a measure of the overall amplitude of the acceleration signal: | *g* |
| **Mean of Magnitude** | Euclidean norm of the acceleration vector, calculated as the square root of the sum of the squares of the acceleration data on the three axes (X, Y, Z). It's a measure of motion intensity, without taking direction into account: | *g* |
| **Std** | Standard deviation of magnitude: |  |
| **Amplitude range** | Difference between min-max of magnitude: | *g* |
| **Signal Magnitude Area** | Sum of absolute values for each axis: | *g* |
| **Curve Lenght** | Sum of the absolute differences between adjacent values in the magnitude: | *g* |
| **Non-linear energy** | Mean of the differences between the square of the values and the product of the two adjacent values in the magnitude: | *g* |
| ***Frequency-domain features*** | | |  |
| **PSD (Not feature)** |  | *g* | *10,13* |
| **Tremors** | Amount of vibration due to tremors ([3.5 - 7.5]): | *g* |
| **FFT magnitude Normalized (not feature)** |  | *g* |
| **FFT Magnitude combined 3 axes (not feature)** |  | *g* |
| **FFT Energy (not feature)** | squared sum of its spectral coefficients (sum of the squared discrete FFT component magnitudes of the signal) normalized by the length of the window: | *g2/Hz* |
| **FFT mean energy** | Mean of FFT energy: | *g* |
| **FFT Std energy** | Standard deviation of FFT energy: | *g* |
| **Peak power** | maximum power observed in the FFT spectrum of the acceleration signal: | *g* |
| **Peak frequency** | Frequency with the maximum magnitude in the FFT spectrum: | *g* |
| **Daily-life signal** | | |  |
| ***Time-domain features*** | | |  |
| **Day** | Separation of weekdays and weekends | *No unit* | *32* |
| **Time** | Separation of daytime (8am to 4pm) and evening/night-time schedules | *No unit* |

**RESULTS.**

**Supplementary Table 2. Results of features filtering**

| **Cases of rejection** | **Number of features** | **Name of features** |
| --- | --- | --- |
| Low standard deviation (≤5%) | 22 | "Accelerometer Peak Frequency", "EDA Kurtosis", "EDA MFCC 0 Std", "EDA MFCC 1 Std", "EDA MFCC 10 Std", "EDA MFCC 11 Std", "EDA MFCC 12 Std", "EDA MFCC 2 Std", "EDA MFCC 3 Std", "EDA MFCC 4 Std", "EDA MFCC 5 Std", "EDA MFCC 6 Std", "EDA MFCC 7 Std", "EDA MFCC 8 Std", "EDA MFCC 9 Std", "EDA Phasic Mean", "HRV AI", "HRV C1a", "HRV C1d", "HRV GI", "HRV SDANN1", "HRV SI" |
| High Pearson correlation (≥0.98) | 24 | ["HRV C1a", "HRV C1d"]; ["EDA MFCC 11 Mean", "EDA MFCC 11 Median"]; ["EDA MFCC 4 Mean", "EDA MFCC 4 Median"]; ["EDA MFCC 7 Mean", "EDA MFCC 7 Median"]  ["EDA MFCC 8 Mean", "EDA MFCC 8 Median"]; ["EDA MFCC 9 Mean", "EDA MFCC 9 Median"]; ["EDA MFCC 10 Mean", "EDA MFCC 10 Median"]; ["EDA MFCC 5 Mean", "EDA MFCC 5 Median"]; ["EDA MFCC 12 Mean", "EDA MFCC 12 Median"]; ["EDA MFCC 2 Mean", "EDA MFCC 2 Median"]; ["EDA MFCC 3 Mean", "EDA MFCC 3 Median"]; ["EDA MFCC 6 Mean", "EDA MFCC 6 Median"]; ["EDA MFCC 1 Mean", "EDA MFCC 1 Median"]; ["EDA MFCC 0 Mean", "EDA MFCC 0 Median"]; ["EDA Mean", "EDA Power", "EDA Tonic Mean"]; ["HRV CVNN", "HRV CVSD", "HRV RMSSD", "HRV S", "HRV SD1", "HRV SD2", "HRV SDNN", "HRV SDNNI1", "HRV SDNNI2", "HRV SDSD"]; ["EDA PSD Max", "EDA PSD Mean", "EDA PSD Std"]; ["EDA Std", "EDA Tonic Std"]; ["HRV CVNN", "HRV CVSD"]; ["HRV SDNNI1", "HRV SDNNI2"]; ["Accelerometer FFT Std Energy", "Accelerometer Peak Power"]; ["Accelerometer Non-linear energy", "Accelerometer Tremors"]; ["EDA Phasic Max", "EDA Phasic Std"]; ["EDA Wavelet 1 Energy", "EDA Wavelet 1 RMS"] |
| High Spearman correlation (≥0.98) | 34 | ["EDA MFCC 3 Mean", "EDA MFCC 3 Median"]; ["EDA MFCC 5 Mean", "EDA MFCC 5 Median"]; ["HRV CSI", "HRV SD1SD2"]; ["EDA MFCC 2 Mean", "EDA MFCC 2 Median"]; ["HRV Power HF", "HRV Power log HF"]; ["HRV CSI Modified", "HRV CVI", "HRV CVNN", "HRV CVSD", "HRV RMSSD", "HRV S", "HRV SD1", "HRV SD2", "HRV SDNN", "HRV SDNNI1", "HRV SDNNI2", "HRV SDSD"]; ["HRV CVI", "HRV S", "HRV SD2", "HRV SDNN", "HRV SDNNI2"]; ["EDA Power", "EDA Wavelet 0 Energy", "EDA Wavelet 0 RMS"]; ["EDA Wavelet 1 Energy", "EDA Wavelet 1 RMS"]; ["EDA Wavelet 2 Energy", "EDA Wavelet 2 RMS"]; ["EDA Wavelet 3 Energy", "EDA Wavelet 3 RMS"]; ["EDA Wavelet 4 Energy", "EDA Wavelet 4 RMS"]; ["HRV C1a", "HRV C1d"]; ["EDA MFCC 6 Mean", "EDA MFCC 6 Median"]; ["EDA MFCC 12 Mean", "EDA MFCC 12 Median"]; ["EDA MFCC 7 Mean", "EDA MFCC 7 Median"]; ["EDA MFCC 0 Mean", "EDA MFCC 0 Median"]; ["EDA MFCC 4 Mean", "EDA MFCC 4 Median"]; ["EDA MFCC 1 Mean", "EDA MFCC 1 Median"]; ["EDA MFCC 11 Mean", "EDA MFCC 11 Median"]; ["EDA MFCC 8 Mean", "EDA MFCC 8 Median"]; ["EDA MFCC 10 Mean", "EDA MFCC 10 Median"]; ["EDA MFCC 9 Mean", "EDA MFCC 9 Median"]; ["EDA Mean", "EDA Power", "EDA Tonic Max", "EDA Tonic Mean"]; ["EDA PSD Max", "EDA PSD Mean", "EDA PSD Std"]; ["HRV SDNNI1", "HRV SDNNI2"]; ["EDA SCR Area Under Curve", "EDA SCR Mean"]; ["EDA Std", "EDA Tonic Std"]; ["HRV CVNN", "HRV CVSD"]; ["Accelerometer Non-linear energy", "Accelerometer Std", "Accelerometer Tremors"]; ["Accelerometer FFT Std Energy", "Accelerometer Peak Power"]; ["HRV IALS", "HRV PIP"]; ["EDA Phasic Min", "EDA Phasic Std"]; ["HRV pNN20", "HRV pNN50"] |
| High Kendall correlation (≥0.98) | 25 | ["EDA MFCC 4 Mean", "EDA MFCC 4 Median"]; ["EDA Wavelet 0 Energy", "EDA Wavelet 0 RMS"]; ["HRV CSI", "HRV SD1SD2"]; ["EDA MFCC 3 Mean", "EDA MFCC 3 Median"]  ["HRV Power HF", "HRV Power log HF"]; ["HRV RMSSD", "HRV SD1", "HRV SDSD"]  ["HRV CVI", "HRV S", "HRV SDNN"]; ["EDA Wavelet 1 Energy", "EDA Wavelet 1 RMS"]; ["EDA Wavelet 2 Energy", "EDA Wavelet 2 RMS"]; ["EDA Wavelet 3 Energy", "EDA Wavelet 3 RMS"]; ["EDA Wavelet 4 Energy", "EDA Wavelet 4 RMS"]; ["HRV C1a", "HRV C1d"]; ["EDA MFCC 8 Mean", "EDA MFCC 8 Median"]; ["EDA MFCC 5 Mean", "EDA MFCC 5 Median"]; ["EDA MFCC 9 Mean", "EDA MFCC 9 Median"]; ["EDA MFCC 2 Mean", "EDA MFCC 2 Median"]; ["EDA MFCC 0 Mean", "EDA MFCC 0 Median"]; ["EDA MFCC 1 Mean", "EDA MFCC 1 Median"]; ["EDA MFCC 12 Mean", "EDA MFCC 12 Median"]; ["EDA MFCC 11 Mean", "EDA MFCC 11 Median"]; ["EDA MFCC 7 Mean", "EDA MFCC 7 Median"]; ["EDA MFCC 10 Mean", "EDA MFCC 10 Median"]; ["EDA MFCC 6 Mean", "EDA MFCC 6 Median"]; ["EDA Mean", "EDA Tonic Mean"]; ["EDA PSD Max", "EDA PSD Std"] |

**SUPPLEMENTARY REFERENCES**

1 Heishman, S. J., Lee, D. C., Taylor, R. C. & Singleton, E. G. Prolonged duration of craving, mood, and autonomic responses elicited by cues and imagery in smokers: Effects of tobacco deprivation and sex. *Exp Clin Psychopharmacol* **18**, 245-256, doi:10.1037/a0019401 (2010).

2 Shiffman, S. *et al.* Efficacy of acute administration of nicotine gum in relief of cue-provoked cigarette craving. *Psychopharmacology (Berl)* **166**, 343-350, doi:10.1007/s00213-002-1338-1 (2003).

3 Niaura, R. *et al.* Comparative efficacy of rapid-release nicotine gum versus nicotine polacrilex gum in relieving smoking cue-provoked craving. *Addiction* **100**, 1720-1730, doi:10.1111/j.1360-0443.2005.01218.x (2005).

4 Heishman, S. J., Saha, S. & Singleton, E. G. Imagery-induced tobacco craving: duration and lack of assessment reactivity bias. *Psychol Addict Behav* **18**, 284-288, doi:10.1037/0893-164x.18.3.284 (2004).

5 Zhong, F., Wu, L. Z. & Han, J. S. Suppression of cue-induced heroin craving and cue-reactivity by single-trial transcutaneous electrical nerve stimulation at 2 Hz. *Addict Biol* **11**, 184-189, doi:10.1111/j.1369-1600.2006.00020.x (2006).

6 Heishman, S. J., Singleton, E. G. & Moolchan, E. T. Tobacco Craving Questionnaire: Reliability and validity of a new multifactorial instrument. *Nicotine & Tobacco Research* **5**, 645-654, doi:10.1080/1462220031000158681 (2003).

7 Ralevski, E., Petrakis, I. & Altemus, M. Heart rate variability in alcohol use: A review. *Pharmacology Biochemistry and Behavior* **176**, 83-92, doi:10.1016/j.pbb.2018.12.003 (2019).

8 Karthikeyan, P., Murugappan, M. & Yaacob, S. Descriptive analysis of skin temperature variability of sympathetic nervous system activity in stress. *Journal of Physical Therapy Science* **24**, 1341-1344 (2012).

9 Tsai, C.-F., Sue, K.-L., Hu, Y.-H. & Chiu, A. Combining feature selection, instance selection, and ensemble classification techniques for improved financial distress prediction. *Journal of Business Research* **130**, 200-209, doi:<https://doi.org/10.1016/j.jbusres.2021.03.018> (2021).

10 Nakajima, M. *et al.* Using novel mobile sensors to assess stress and smoking lapse. *Int J Psychophysiol* **158**, 411-418, doi:10.1016/j.ijpsycho.2020.11.005 (2020).

11 Yang, J. *et al.* Study on PPG Biometric Recognition Based on Multifeature Extraction and Naive Bayes Classifier. *Scientific Programming* **2021**, 5597624, doi:10.1155/2021/5597624 (2021).

12 Lutin, E., Hashimoto, R., De Raedt, W. & Van Hoof, C. in *BIOSIGNALS.* 177-185 (Vienna, Austria).

13 Maxhuni, A. *et al.* Classification of bipolar disorder episodes based on analysis of voice and motor activity of patients. *Pervasive and Mobile Computing* **31**, 50-66, doi:<https://doi.org/10.1016/j.pmcj.2016.01.008> (2016).

14 Habets, J. G. *et al.* Rapid dynamic naturalistic monitoring of bradykinesia in Parkinson’s disease using a wrist-worn accelerometer. *Sensors* **21**, 7876 (2021).

15 Boucsein, W. *et al.* Publication recommendations for electrodermal measurements. *Psychophysiology* **49**, 1017-1034, doi:10.1111/j.1469-8986.2012.01384.x (2012).

16 Shukla, J., Barreda-Ángeles, M., Oliver, J., Nandi, G. C. & Puig, D. Feature Extraction and Selection for Emotion Recognition from Electrodermal Activity. *IEEE Transactions on Affective Computing* **12**, 857-869, doi:10.1109/TAFFC.2019.2901673 (2021).

17 Salanke, N. S. G. R., Kumar, M. V. V. & Samraj, A. Performance Evaluation of PPG based multimodal biometric system using modified Min-Max Normalization. *International Journal of Applied Engineering Research* **13**, 11279-11284 (2018).

18 Migenda, N., Möller, R. & Schenck, W. Adaptive dimensionality reduction for neural network-based online principal component analysis. *PLOS ONE* **16**, e0248896, doi:10.1371/journal.pone.0248896 (2021).

19 Braeken, J. & van Assen, M. A. L. M. An empirical Kaiser criterion. *Psychological Methods* **22**, 450-466, doi:10.1037/met0000074 (2017).

20 Cattell, R. B. The Scree Test For The Number Of Factors. *Multivariate Behav Res* **1**, 245-276, doi:10.1207/s15327906mbr0102_10 (1966).

21 Abdi, H. & Williams, L. J. Principal component analysis. *WIREs Computational Statistics* **2**, 433-459, doi:<https://doi.org/10.1002/wics.101> (2010).

22 Wong, T. T. & Yeh, P. Y. Reliable Accuracy Estimates from k-Fold Cross Validation. *IEEE Transactions on Knowledge and Data Engineering* **32**, 1586-1594, doi:10.1109/TKDE.2019.2912815 (2020).

23 Ganz, M. & Konukoglu, E. in *2017 International Workshop on Pattern Recognition in Neuroimaging (PRNI).* 1-4.

24 Simons, A., Doyle, T., Musson, D. & Reilly, J. in *2020 IEEE International Conference on Systems, Man, and Cybernetics (SMC).* 241-247 (IEEE).

25 Benedek, M. & Kaernbach, C. A continuous measure of phasic electrodermal activity. *J Neurosci Methods* **190**, 80-91, doi:10.1016/j.jneumeth.2010.04.028 (2010).

26 Posada-Quintero, H. F. & Chon, K. H. Innovations in electrodermal activity data collection and signal processing: A systematic review. *Sensors* **20**, 479 (2020).

27 Pope, G. *et al.* in *2018 IEEE 15th International Conference on Wearable and Implantable Body Sensor Networks (BSN).* 193-196 (IEEE).

28 Park, J., Seok, H. S., Kim, S. S. & Shin, H. Photoplethysmogram Analysis and Applications: An Integrative Review. *Front Physiol* **12**, 808451, doi:10.3389/fphys.2021.808451 (2021).

29 Maqsood, S., Xu, S., Springer, M. & Mohawesh, R. A Benchmark Study of Machine Learning for Analysis of Signal Feature Extraction Techniques for Blood Pressure Estimation Using Photoplethysmography (PPG). *IEEE Access* **9**, 138817-138833, doi:10.1109/ACCESS.2021.3117969 (2021).

30 Gielen, J. & Aerts, J.-M. Feature Extraction and Evaluation for Driver Drowsiness Detection Based on Thermoregulation. *Applied Sciences* **9**, 3555 (2019).

31 Nakajima, M. *et al.* Using novel mobile sensors to assess stress and smoking lapse. *International Journal of Psychophysiology* **158**, 411-418, doi:<https://doi.org/10.1016/j.ijpsycho.2020.11.005> (2020).

32 Cleveland, H. H. *et al.* Effectiveness and Utility of Mobile Device Assessment of Subjective Craving during Residential Opioid Dependence Treatment. *Subst Use Misuse* **56**, 1284-1294, doi:10.1080/10826084.2021.1921808 (2021).
