# Supplementary figures and images for: The Autonomic Craving Signature: physiological signals as a daily-life biomarker of craving
Source: Research Square preprint supplement (doi:10.21203/rs.3.rs-4432651/v1), 2024-12-17

**Supplementary Figure 2. Explained variance ratio graphic.**

**
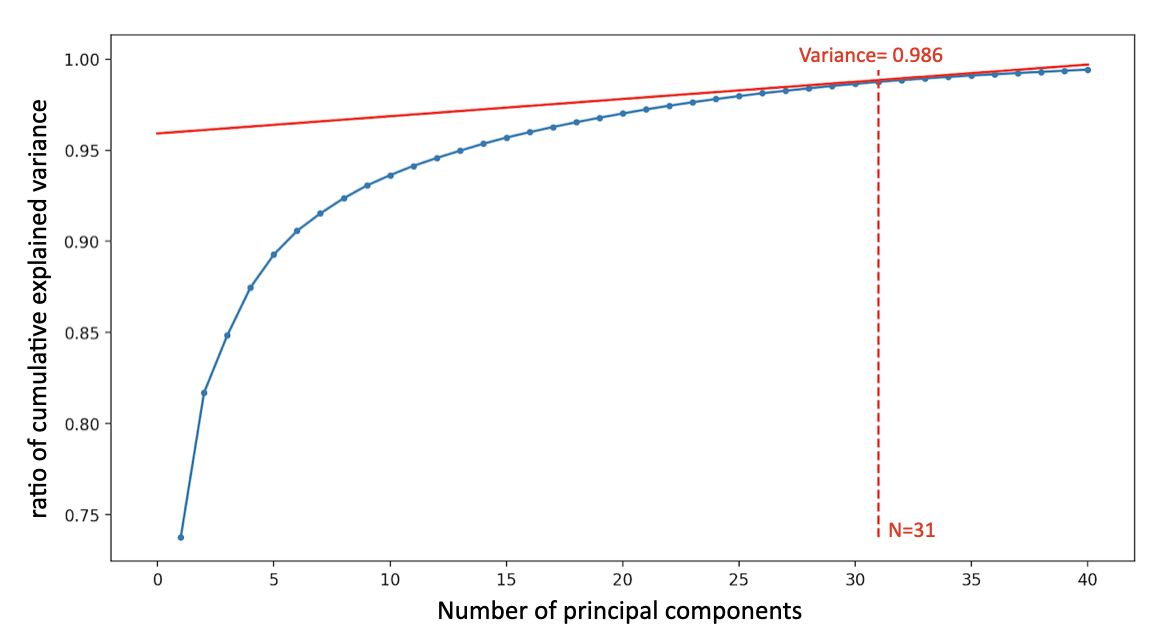
**

Supplement: Supplementary file 1 [file 468e67d8250b66be50030655.docx]

**Supplementary Figure 1. Integrated participant and data selection process**

**
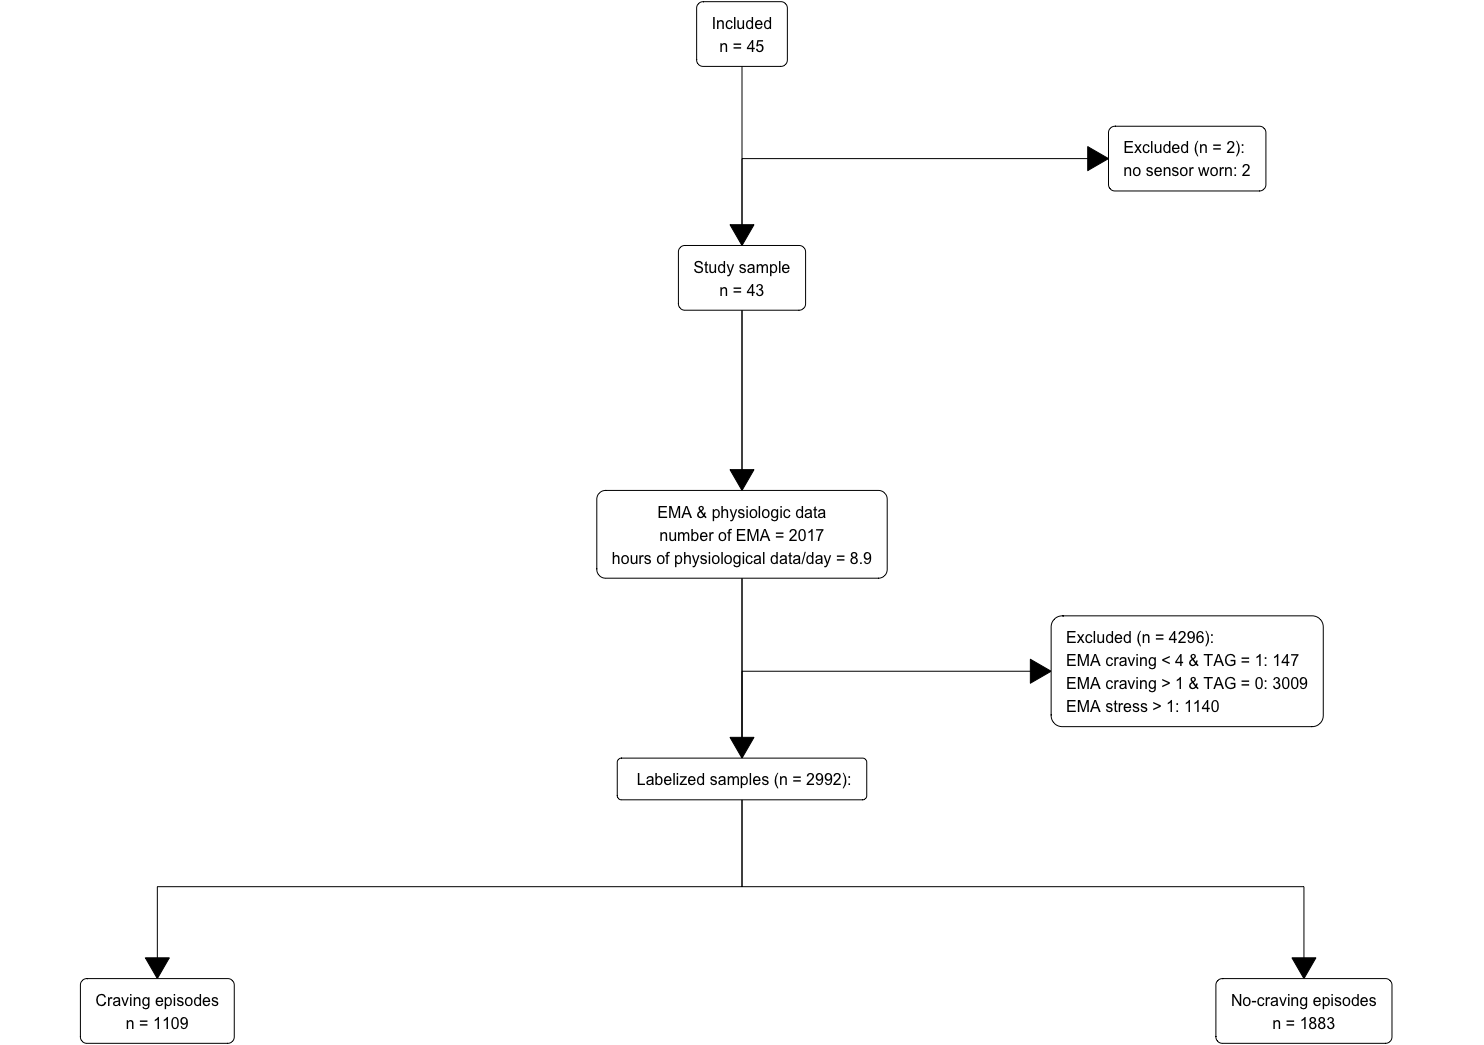
**

Supplement: Supplementary file 3 [file d9e62d29597f82d82b0b55fd.docx]
